# Supplementary material
Source: Springer Nature journal article supplement (https://www.springermedizin.de/resource/supplementary/12885_2013_4409_MOESM15_ESM.pdf/9466360)
Supplement: MOESM15 [file 9466360]

**Additional file 14: Table S13.** Reproducibility of assay methods given by N (%) patients for each combination of missing/observed for two independent runs and the correlation coefficients when data were observed in both runs.

| <b>Variable</b> | <b>Both Observed</b> | <b>Run 1 Observed<br/>Run 2 Missing</b> | <b>Run 1 Missing<br/>Run 2 Observed</b> | <b>Both Missing</b> | <b>Correlation (95% CI)</b> |
|-----------------|----------------------|-----------------------------------------|-----------------------------------------|---------------------|-----------------------------|
| CCND1           | 136 (80.0%)          | 6 (3.5%)                                | 12 (7.1%)                               | 16 (9.4%)           | 0.81 (0.66, 0.90)           |
| CD44            | 135 (79.4%)          | 13 (7.6%)                               | 7 (4.1%)                                | 15 (8.8%)           | 0.62 (0.50, 0.72)           |
| CD44v6          | 141 (82.9%)          | 2 (1.2%)                                | 11 (6.5%)                               | 16 (9.4%)           | 0.72 (0.62, 0.82)           |
| HA              | 138 (81.2%)          | 12 (7.1%)                               | 5 (2.9%)                                | 15 (8.8%)           | 0.69 (0.59, 0.79)           |
| HAS2            | 134 (78.8%)          | 14 (8.2%)                               | 3 (1.8%)                                | 19 (11.2%)          | 0.57 (0.44, 0.67)           |
| HMMR            | 121 (71.2%)          | 18 (10.6%)                              | 13 (7.6%)                               | 18 (10.6%)          | 0.54 (0.44, 0.64)           |
| HYAL1           | 144 (84.7%)          | 3 (1.8%)                                | 6 (3.5%)                                | 17 (10.0%)          | 0.58 (0.46, 0.68)           |
| SMAD4           | 129 (75.9%)          | 1 (0.6%)                                | 20 (11.8%)                              | 20 (11.8%)          | 0.57 (0.43, 0.69)           |
